# Supplementary material
Source: publisher figshare collection journal article supplement (https://acs.figshare.com/ndownloader/files/5774208)
Supplement: Supplementary file 1 [file 5774208]

Journal of  
**Medicinal Chemistry**

J. Med. Chem., 1998, 41(19), 3563-3567, DOI: [10.1021/jm980295f](https://doi.org/10.1021/jm980295f)

**Terms & Conditions**

Electronic Supporting Information files are available without a subscription to ACS Web Editions. The American Chemical Society holds a copyright ownership interest in any copyrightable Supporting Information. Files available from the ACS website may be downloaded for personal use only. Users are not otherwise permitted to reproduce, republish, redistribute, or sell any Supporting Information from the ACS website, either in whole or in part, in either machine-readable form or any other form without permission from the American Chemical Society. For permission to reproduce, republish and redistribute this material, requesters must process their own requests via the RightsLink permission system. Information about how to use the RightsLink permission system can be found at <http://pubs.acs.org/page/copyright/permissions.html>

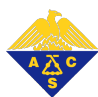

**ACS Publications**  
MOST TRUSTED. MOST CITED. MOST READ.

Copyright © 1998 American Chemical Society

### Crystallization of the complex of cathepsin K with inhibitor 4

Crystals of mature activated cathepsin K complexed with the inhibitor grew from a solution of 28% MPD, 0.1 M MES at pH 7.0 and 0.1 M tris buffer at pH 7.0. Crystals of the complex are orthorhombic, space group  $P2_12_12_1$ , with cell constants of  $a=38.84$ ,  $b=50.99$  and  $c=103.58$  Ångstroms. The crystals contain one molecule in the asymmetric unit and approximately 40% solvent with a  $V_m$  value of  $2.18 \text{ Å}^3/\text{Dalton}$ . X-ray diffraction data were measured from a single crystal using a Siemens two-dimensional position-sensitive detector on a Siemens rotating anode generate operating at 5 KW. The structure was determined by molecular replacement using X-PLOR. The structure was determined by rigid body refinement with the protein atoms of cathepsin K using X-PLOR at 2.5 Ångstroms resolution.<sup>1</sup> Fourier maps with coefficients  $|F_o - F_c|$  and  $|2F_o - F_c|$ , were used to the atomic model of the inhibitor using the molecular graphics program FRODO. Conventional positional refinement was used to refine the structure during model building using X-PLOR. Several cycles of map fitting and refinement were carried out to a final  $R_c$  of 0.193.

#### Crystallization of the complex of cathepsin K with the inhibitor 14

Crystals of mature activated cathepsin K complexed with the inhibitor grew from a solution of 30% MPD, 0.1 M MES at pH 7.0 and 0.1 M tris buffer at pH 7.0. Crystals of the complex are isomorphous with those described above. Diffraction data were collected as described above. The structure was determined by rigid body refinement of the cathepsin K protein atoms with X-PLOR as described above at 2.3 Ångstroms resolution. Conventional positional refinement was used to refine the structure during model building using X-PLOR. Several cycles of map fitting and refinement were carried out to a final  $R_C$  of 0.26.

(1) Zhao, B., Janson, C.A., Amegadzie, B.Y., D'Alessio, K., Griffin, C., Hanning, C.R., Jones, C., Kurdyla, J., McQueney, M., Qiu, X., Smith, W.W. & Abdel Meguid, S.S. (1997). Crystal structure of human osteoclast cathepsin K complex with E-64. *Nat. Struct. Biol.* **4**, 109-111.
